# Supplementary material for: Hybrid organic–inorganic catalytic mesoporous materials with proton sponges as building blocks
Source: Royal Society of Chemistry journal article supplement (doi:10.1039/c1cp20588a), 2011-01-01
Supplement: c1cp20588a.pdf [file c1cp20588a.pdf]

## Supplementary Information

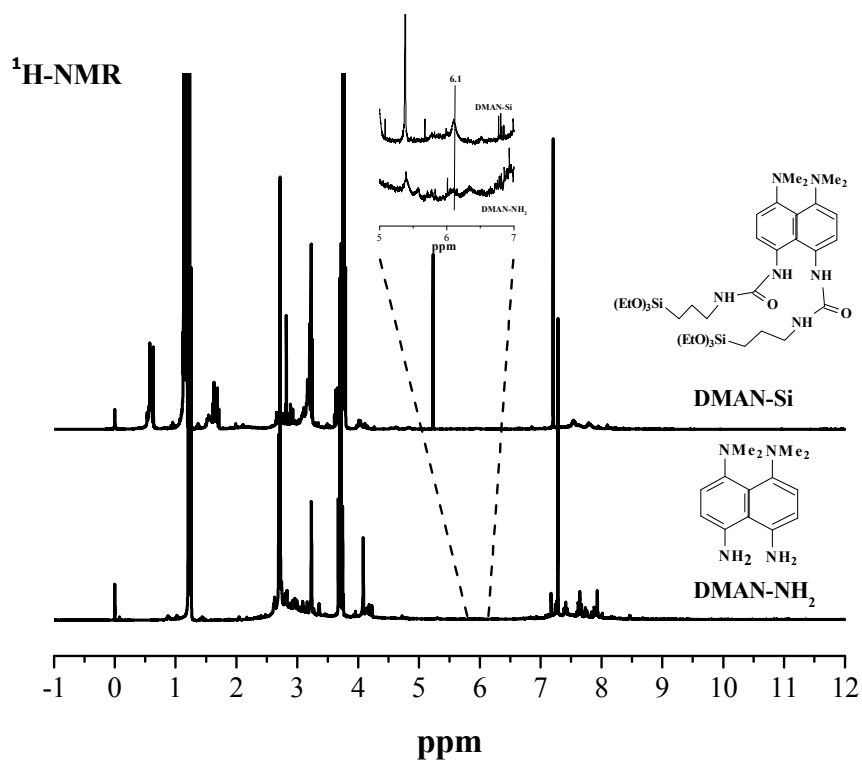

Fig.S1 – <sup>1</sup>H NMR spectra of DMAN-NH<sub>2</sub> and DMAN-Si

<sup>13</sup>C-NMR

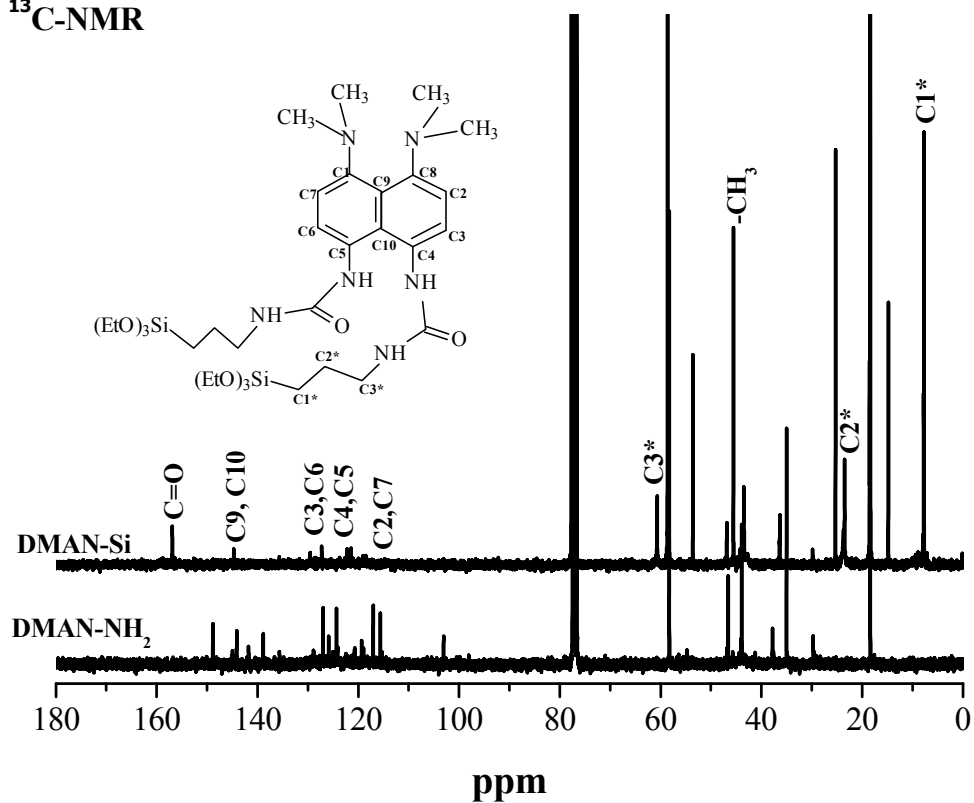

Fig. S2 – <sup>13</sup>C NMR spectra of DMAN-NH<sub>2</sub> and DMAN-Si

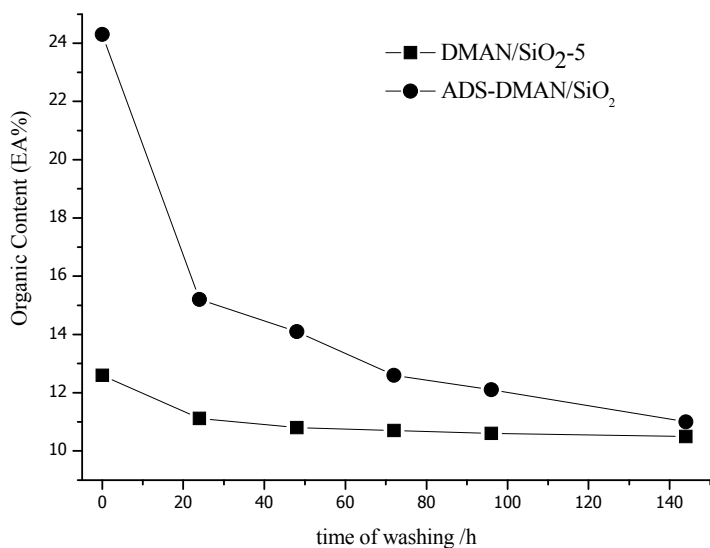

Fig. S3. Organic content vs the time of washing of the DMAN/SiO<sub>2</sub>-5 and ADS-DMAN/SiO<sub>2</sub> materials.

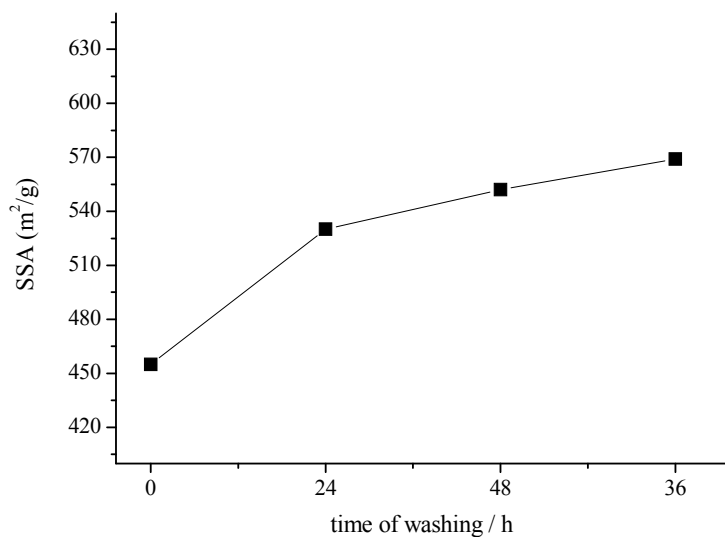

Fig.S4 – SSA vs the time of washing of the DMAN/SiO<sub>2</sub>-5 material.
